# Supplementary material for: Impacts of Aerosol Particle Size Distribution and Land Cover Land Use on Precipitation in a Coastal Urban Environment Using a Cloud-Resolving Mesoscale Model
Source: Hindawi journal article supplement (doi:10.1155/2014/904571), 2014-01-01
Supplement: f1 [file 904571.f1.docx]

Table A1 NLCD 2006 Land classes and their properties.

Source: <http://www.mrlc.gov/nlcd06_leg.php>

| **Class\ Value** | **Classification Description** |
| --- | --- |
| **Water** | *areas of open water or permanent ice/snow cover.* |
| 11 | **Open Water** - areas of open water, generally with less than 25% cover of vegetation or soil. |
| 12 | **Perennial Ice/Snow** - areas characterized by a perennial cover of ice and/or snow, generally greater than 25% of total cover. |
| **Developed** | *areas characterized by a high percentage (30% or greater) of constructed materials (e.g. asphalt, concrete, buildings, etc.).* |
| 21 | **Developed, Open Space** - areas with a mixture of some constructed materials, but mostly vegetation in the form of lawn grasses. Impervious surfaces account for less than 20% of total cover. Include large-lot single-family housing units, parks, golf courses, etc. |
| 22 | **Developed, Low Intensity** - areas with a mixture of constructed materials and vegetation. Impervious surfaces account for 20% to 49% percent of total cover. These areas most commonly include single-family housing units. |
| 23 | **Developed, Medium Intensity** – areas with a mixture of constructed materials and vegetation. Impervious surfaces account for 50% to 79% of the total cover. These areas most commonly include single-family housing units. |
| 24 | **Developed High Intensity** -highly developed areas where people reside or work in high numbers including apartment complexes, row houses and commercial/industrial. Impervious surfaces account for 80% to 100% of the total cover. |
| **Barren** | *areas characterized by bare rock, gravel, sand, silt, clay, or other earthen material, with little or no "green" vegetation present regardless of its inherent ability to support life.* |
| 31 | **Barren Land (Rock/Sand/Clay)** - areas of bedrock, desert pavement, scarps, talus, slides, volcanic material, glacial debris, sand dunes, strip mines, gravel pits and other accumulations of earthen material. Generally, vegetation accounts for less than 15% of total cover. |
| **Forest** | *areas characterized by tree cover (natural or semi-natural woody vegetation, generally greater than 6 meters tall); tree canopy accounts for 25% to 100% of the cover.* |
| 41 | **Deciduous Forest** - areas dominated by trees generally greater than 5 meters tall, and greater than 20% of total vegetation cover. More than 75% of the tree species shed foliage simultaneously in response to seasonal change. |
| 42 | **Evergreen Forest** - dominated by trees greater than 5 meters tall, and greater than 20% of total vegetation cover. More than 75% of the trees maintain their leaves all year. Canopy is never without green foliage. |
| 43 | **Mixed Forest** - dominated by trees generally greater than 5 meters tall, and greater than 20% of total vegetation cover. Neither deciduous nor evergreen species are greater than 75% of total tree cover. |
| **Shrubland** | *woody vegetation with aerial stems, less than 6 meters tall, with individuals or clumps not touching. Both evergreen and deciduous species of true shrubs, young trees, and trees or shrubs that are small or stunted because of environmental conditions are included.*. |
| 51 | **Dwarf Scrub** - Alaska only. Shrubs less than 20 centimeters tall with shrub canopy typically greater than 20% of total vegetation. Often co-associated with grasses, sedges, herbs, and non-vascular vegetation. |
| 52 | **Shrub/Scrub** - Dominated by shrubs; less than 5 meters tall with shrub canopy typically greater than 20% of total vegetation. Includes true shrubs, and trees stunted from environmental conditions. |
| **Herbaceous** | *areas characterized by natural or semi-natural herbaceous vegetation; herbaceous vegetation accounts for 75% to 100% of the cover.* |
| 71 | **Grassland/Herbaceous** - Dominated by gramanoid or herbaceous vegetation, generally greater than 80% of total vegetation. Not subject to intensive tilling, but can be utilized for grazing. |
| 72 | **Sedge/Herbaceous** - Alaska only areas dominated by sedges and forbs, generally greater than 80% of total vegetation. This type can occur with significant other grasses or other grass like plants, and includes sedge tundra, and sedge tussock tundra. |
| 73 | **Lichens** - Alaska only areas dominated by fruticose or foliose lichens generally greater than 80% of total vegetation. |
| 74 | **Moss** - Alaska only areas dominated by mosses, generally greater than 80% of total vegetation. |
| **Planted/Cultivated** | *areas characterized by herbaceous vegetation that has been planted or is intensively managed for the production of food, feed, or fiber; or is maintained in developed settings for specific purposes. Herbaceous vegetation accounts for 75% to 100% of the cover.* |
| 81 | **Pasture/Hay** – areas of grasses, legumes, or grass-legume mixtures planted for livestock grazing or the production of seed or hay crops, typically on a perennial cycle. Pasture/hay vegetation accounts for greater than 20% of total vegetation. |
| 82 | **Cultivated Crops** – areas used for the production of annual crops, such as corn, soybeans, vegetables, tobacco, and cotton, and also perennial woody crops such as orchards and vineyards. Crop vegetation accounts for greater than 20% of total vegetation. |
| **Wetlands** | *areas where the soil or substrate is periodically saturated with or covered with water.* |
| 90 | **Woody Wetlands** - areas where forest or shrubland vegetation accounts for greater than 20% of vegetative cover and the soil or substrate is periodically saturated with or covered with water. |
| 95 | **Emergent Herbaceous Wetlands** - Areas where perennial herbaceous vegetation accounts for greater than 80% of vegetative cover and the soil or substrate is periodically saturated with or covered with water. |

Table A2: LEAF-3 land designations and properties.

| Albedo green | Albedo brown | emissivity | sr max | Tai_ max | sai | Veg clump | Veg frac | Veg ht | Root dep | Dead frac | Rc min | LEAF-3 Class |
| --- | --- | --- | --- | --- | --- | --- | --- | --- | --- | --- | --- | --- |
| .00 | .00 | .00 | .00 | .00 | .00 | .00 | .00 | .00 | .00 | .00 | 0 | 0 Ocean |
| .00 | .00 | .00 | .00 | .00 | .00 | .00 | .00 | .00 | .00 | .00 | 0 | 1 Lakes, rivers |
| .00 | .00 | .00 | .00 | .00 | .00 | .00 | .00 | .00 | .00 | .00 | 0 | 2 Icecap |
| .00 | .00 | .00 | .00 | .00 | .00 | .00 | .00 | .00 | .00 | .00 | 0 | 3 Desert |
| .14 | .24 | .97 | 5.4 | 8.0 | 1.0 | 1.0 | .80 | 20.0 | 1.5 | .0 | 500 | 4 Evergreen |
| .14 | .24 | .95 | 5.4 | 8.0 | 1.0 | 1.0 | .80 | 22.0 | 1.5 | .0 | 500 | 5 Deciduous Needle leaf |
| .20 | .24 | .95 | 6.2 | 7.0 | 1.0 | .0 | .80 | 22.0 | 1.5 | 0 | 500 | 6 Deciduous Broad leaf |
| .17 | .24 | .95 | 4.1 | 7.0 | 1.0 | .0 | .90 | 32.0 | 1.5 | .0 | 500 | 7 Evergreen Broad leaf |
| .21 | .43 | .96 | 5.1 | 4.0 | 1.0 | .0 | .75 | .3 | .7 | .7 | 100 | 8 Short grass |
| .24 | .43 | .96 | 5.1 | 5.0 | 1.0 | .0 | .80 | 1.2 | 1.0 | .7 | 100 | 9 Tall grass |
| .20 | .24 | .95 | 5.1 | 1.0 | .2 | 1.0 | .20 | .7 | 1.0 | .0 | 500 | 10 Semi desert |
| .20 | .24 | .95 | 5.1 | 4.5 | .5 | 1.0 | .60 | .2 | 1.0 | .0 | 50 | 11 Tundra |
| .14 | .24 | .97 | 5.1 | 5.5 | 1.0 | 1.0 | .70 | 1.0 | 1.0 | 0 | 500 | 12 Evergreen Shrub |
| .20 | .28 | .97 | 5.1 | 5.5 | 1.0 | 1.0 | .70 | 1.0 | 1.0 | .0 | 500 | 13 Deciduous shrub |
| .16 | .24 | .96 | 6.2 | 7.0 | 1.0 | .5 | .80 | 22.0 | 1.5 | .0 | 500 | 14 Mixed woodland |
| .22 | .40 | .95 | 5.1 | 5.0 | .5 | .0 | .85 | 1.0 | 1.0 | .0 | 100 | 15 Crop/mixed  farming |
| .18 | .40 | .95 | 5.1 | 5.0 | .5 | .0 | .80 | 1.1 | 1.0 | .0 | 500 | 16 Irrigated crop |
| .12 | .43 | .98 | 5.1 | 7.0 | 1.0 | .0 | .80 | 1.6 | 1.0 | .0 | 500 | 17 Bog or marsh |
| .20 | .36 | .96 | 5.1 | 6.0 | 1.0 | .0 | .80 | 7.0 | 1.0 | .0 | 100 | 18 Wooded grassland |
| .20 | .36 | .90 | 5.1 | 3.6 | 1.0 | .0 | .74 | 6.0 | .8 | .0 | 500 | 19 Urban and built up |
| .17 | .24 | .95 | 4.1 | 7.0 | 1.0 | .0 | .90 | 32.0 | 1.5 | .0 | 500 | 20 Wetland evergreen broadleaf tree |

Fig. A1: Synthesis of urban effects on precipitation. Based on the ideas of Bornstein (2011) but created by Niyogi (2011), Grimmond (2011), and Shepherd (2011).

**
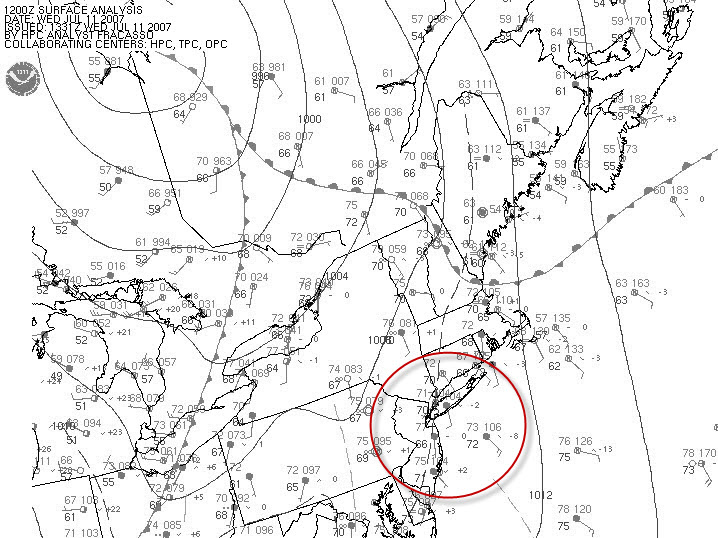
**

Fig. A2: Surface Pressure map for the Northeast United States on 11 July 2007 suggest that rainfall was not due to major synoptic influences or direct frontal movement.

Source: <http://nomads.ncdc.noaa.gov>


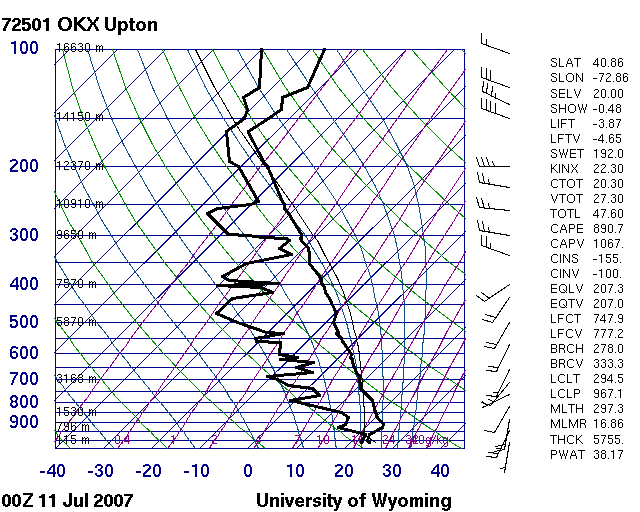


Fig. A3: The Skew-T plot ten hours prior to the rainfall on 11 July 2007. Here the Dew Point line experiences instability in the atmosphere at 300mb. Source: <http://weather.uwyo.edu/upperair/sounding.html>

**
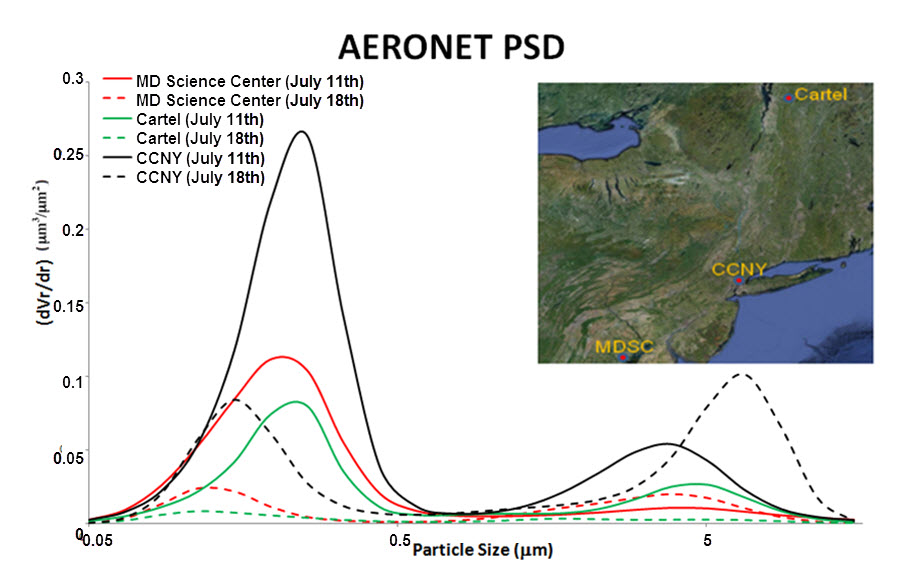
**

Fig. A4: PSD for three sites for 11 July 2007 (HVFM) and 18 July 2007 (HVCM) over NYC, Cartel (45N/71W) and the Maryland Science Center (39N/76W).


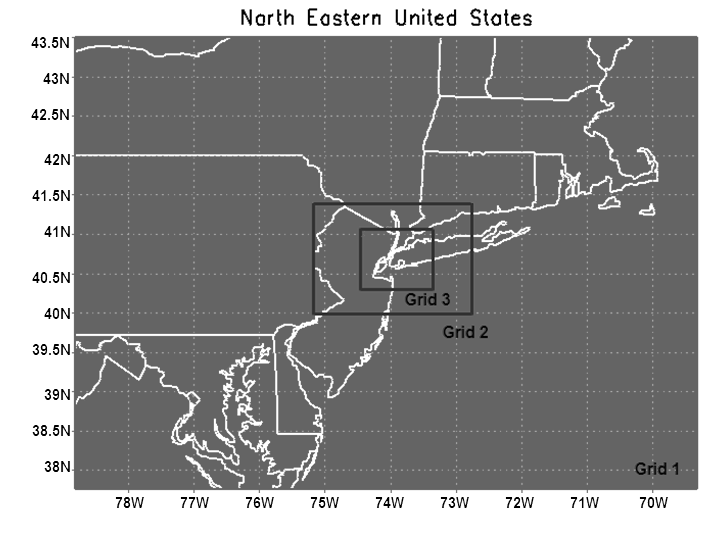


Fig. A5: RAMS Grid set up in the Northeastern United States. The grid resolutions are 16 km,

4 km, and 1 km for grids 1, 2, and 3 respectively.


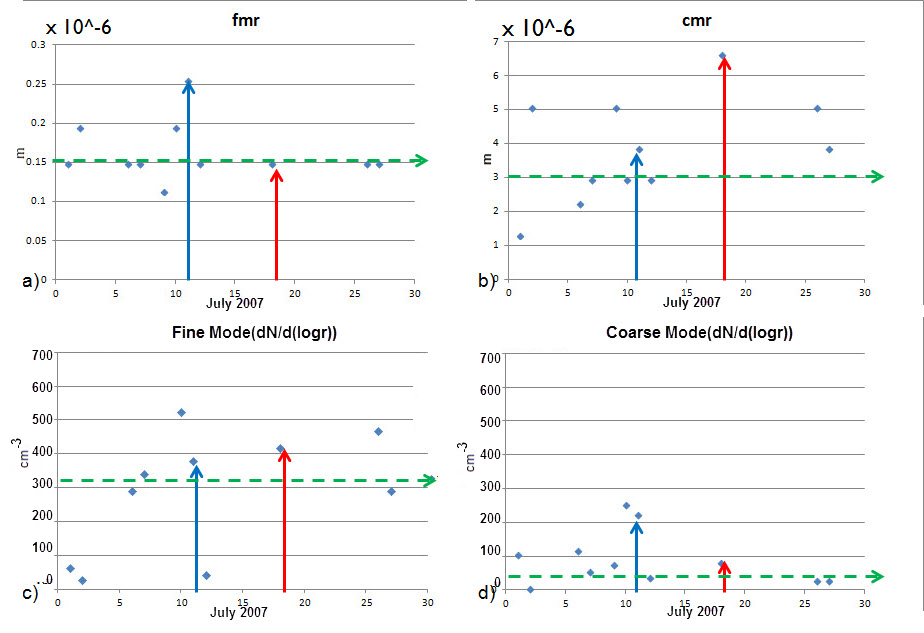


Fig. A6: AERONET PSD data for July 2007. Blue arrows highlight 11 July 2007 data, red arrows highlight 18 July 2007 data. The dashed green arrows represent the average used for cases in which PSD was not updated. a) Fine mode modal radius. b) Coarse mode modal radius. c) Fine mode number concentration. d) Coarse mode number concentration.


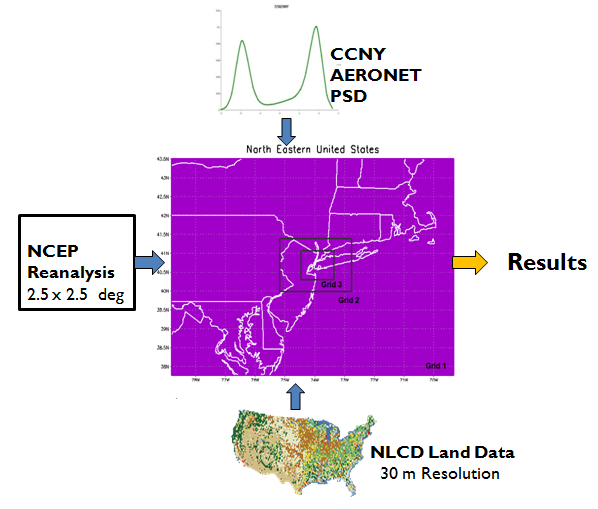


Fig.A7: RAMS model inputs showing data ingestion from AERONET, and assimilation from NLCD/NCEP.
